# Supplementary material for: High abundance of butyrate-producing bacteria in the naso-oropharynx of SARS-CoV-2-infected persons in an African population: implications for low disease severity
Source: PubMed Central journal article supplement (PMC11414296; doi:10.1186/s12879-024-09948-z), 2024-09-20

**A****Pre-vaccination**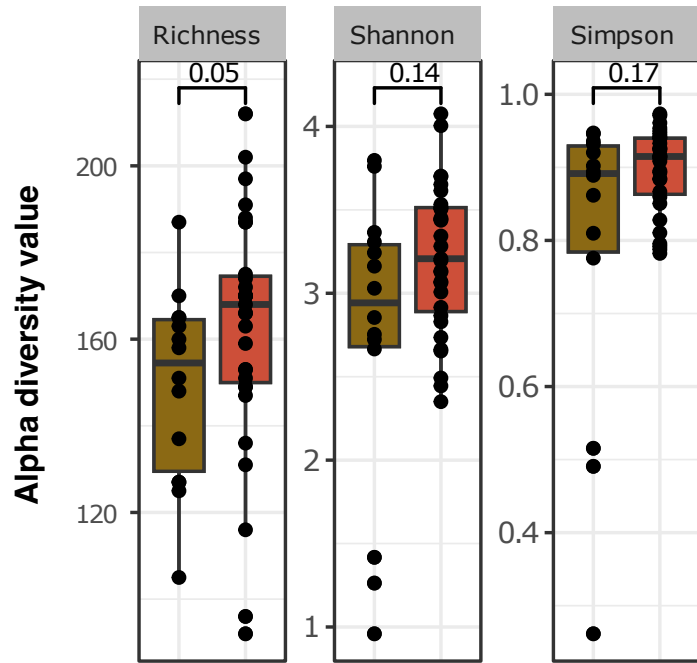**B****Post-vaccination**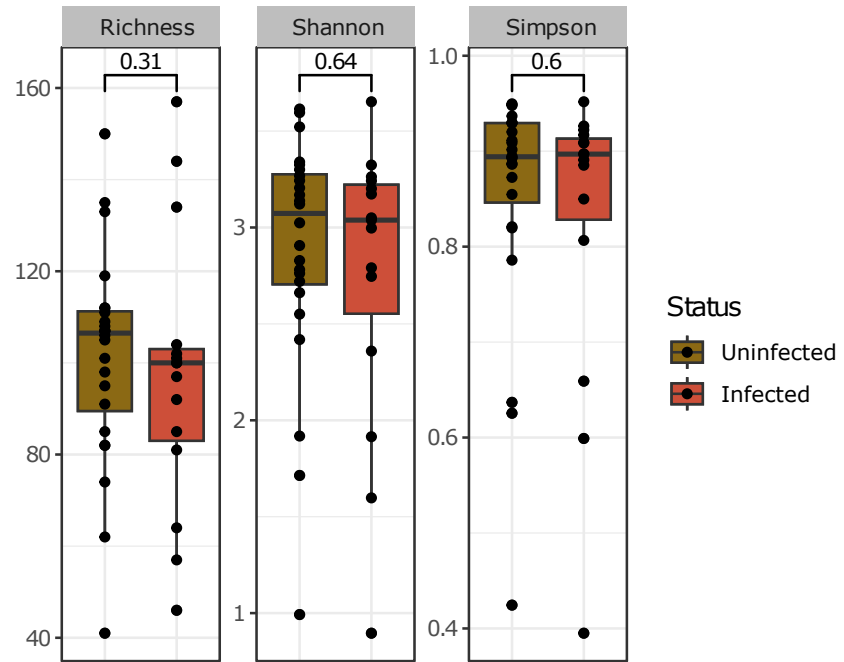

Status

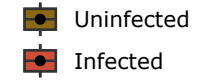

Supplement: 12879_2024_9948_MOESM3_ESM.pdf [file 12879_2024_9948_MOESM3_ESM.pdf]
